# Supplementary material for: Inhibition of Digestive Enzymes and Antioxidant Activity of Extracts from Fruits of Cornus alba, Cornus sanguinea subsp. hungarica and Cornus florida–A Comparative Study
Source: PubMed Central journal article supplement (PMC7020211; doi:10.3390/plants9010122), 2020-01-18
Supplement: plants-09-00122-s001.pdf [file plants-09-00122-s001.pdf]

Article

# Inhibition of digestive enzymes and antioxidant activity of extracts from fruits of *Cornus alba*, *Cornus sanguinea* subsp. *hungarica* and *Cornus florida* – a comparative study

Joanna Truba<sup>1</sup>, Iwona Stanisławska<sup>2</sup>, Marta Walasek<sup>1</sup>, Wioleta Wieczorkowska<sup>1</sup>, Konrad Woliński<sup>3</sup>, Tina Buchholz<sup>4</sup>, Matthias F. Melzig<sup>4</sup>, Monika E. Czerwińska<sup>5,\*</sup>

<sup>1</sup> Student Scientific Association, Department of Pharmacognosy and Molecular Basis of Phytotherapy, Medical University of Warsaw, 1 Banacha street, 02-097 Warsaw, Poland

<sup>2</sup> Department of Bromatology, Medical University of Warsaw, 1 Banacha street, 02-097 Warsaw, Poland

<sup>3</sup> **Polish Academy of Sciences Botanical Garden, Center for Biological Diversity Conservation in Powsin**, 2 Prawdziwka street, 02-973 Warsaw, Poland

<sup>4</sup> Institute of Pharmacy, Freie Universitaet Berlin, 2+4 Koenigin-Luise street, D-14195 Berlin, Germany

<sup>5</sup> Department of Pharmacognosy and Molecular Basis of Phytotherapy, Medical University of Warsaw, 1 Banacha street, 02-097 Warsaw, Poland

\*Corresponding author:

Monika E. Czerwińska, Department of Pharmacognosy and Molecular Basis of Phytotherapy, Medical University of Warsaw, 1 Banacha street, 02-097 Warsaw, Poland

e-mail address: mczerwinska@wum.edu.pl

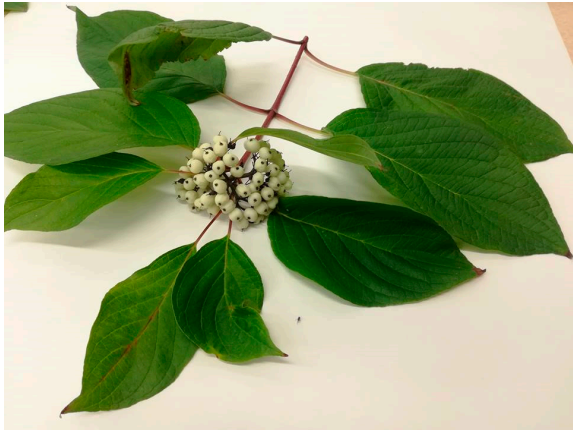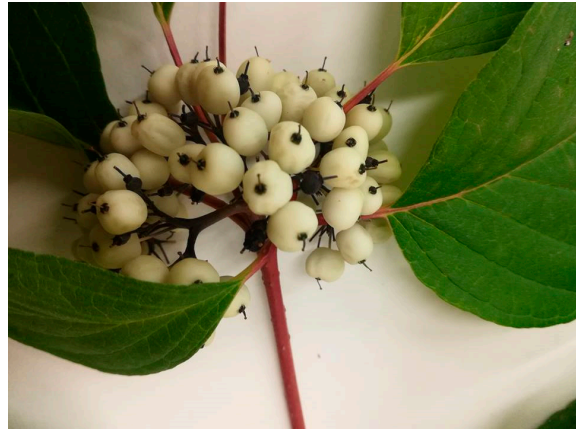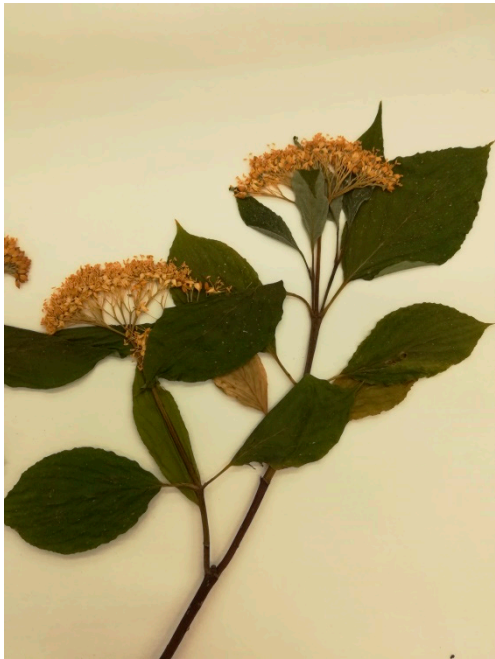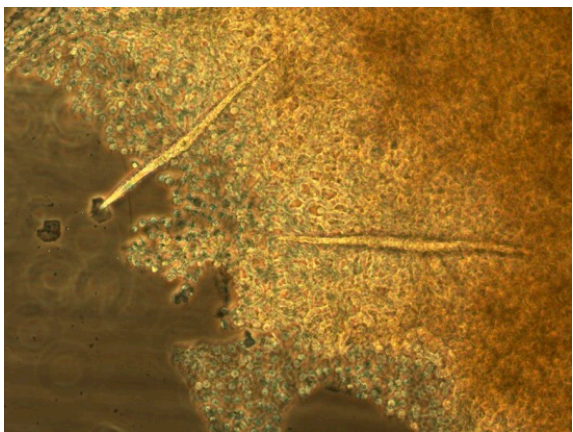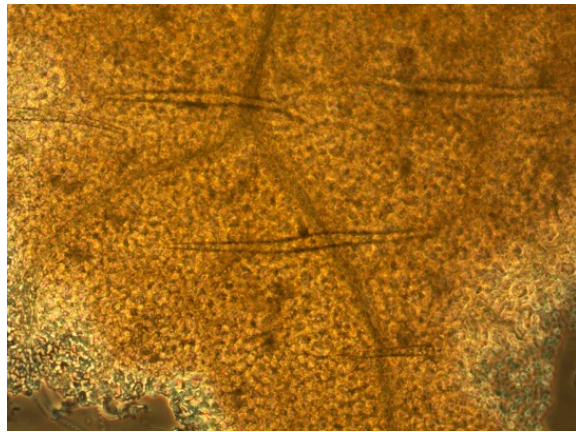

**Figure S1.** Morphological and anatomical characteristics of *Cornus alba* L. plant materials (leaves) in the optical microscope.

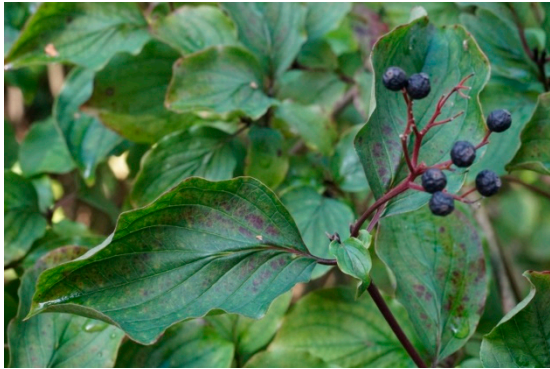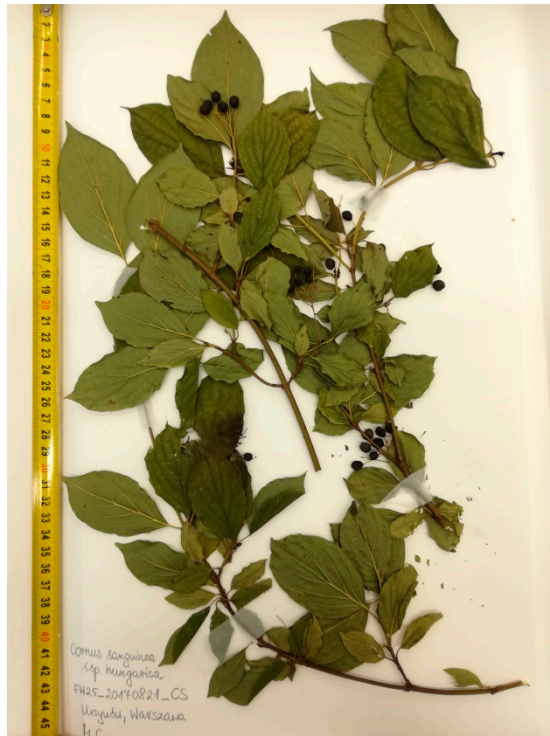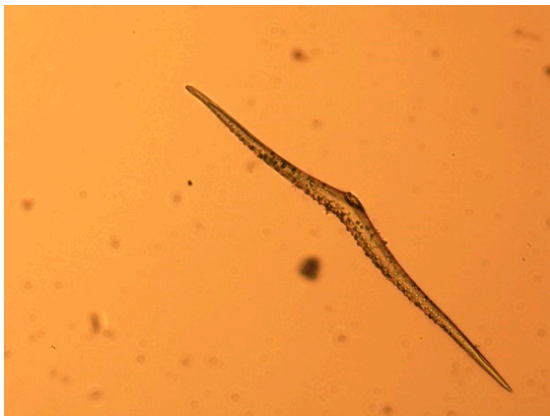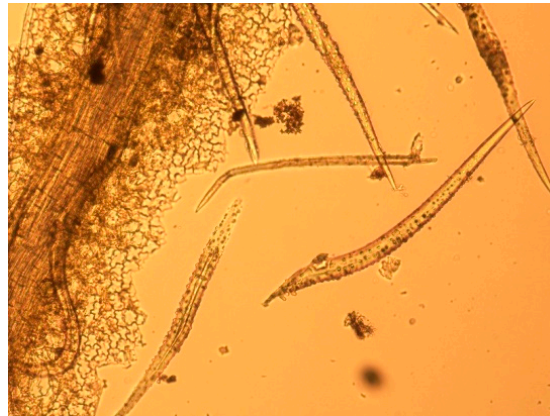

**Figure S2.** Morphological and anatomical characteristics of *Cornus sanguinea* L. subsp. *hungarica* plant materials (leaves) in the optical microscope.

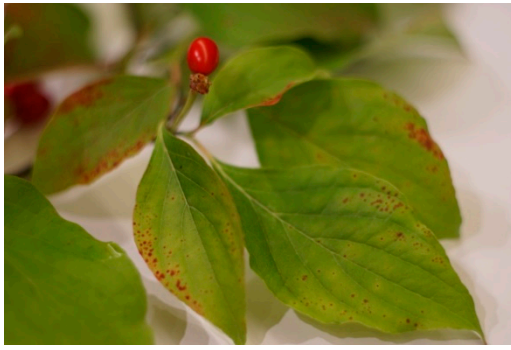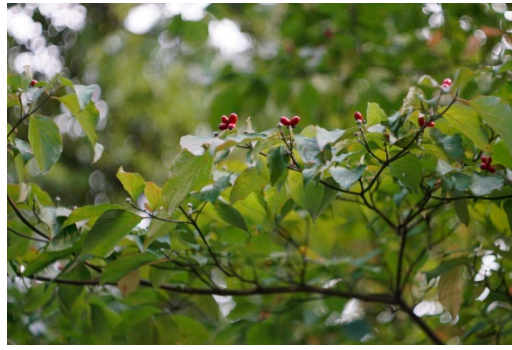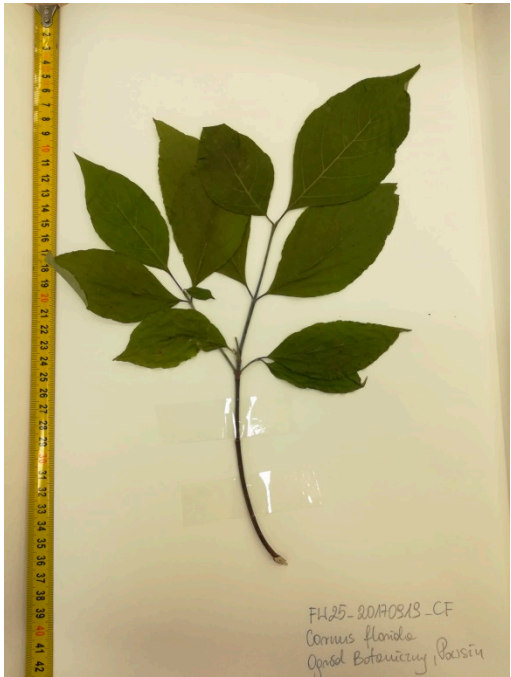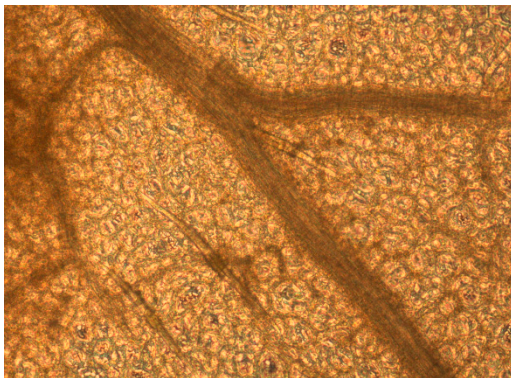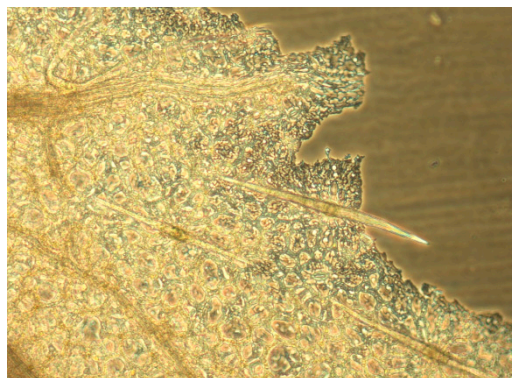

**Figure S3.** Morphological and anatomical characteristics of *Cornus florida* L. plant materials (leaves) in the optical microscope.

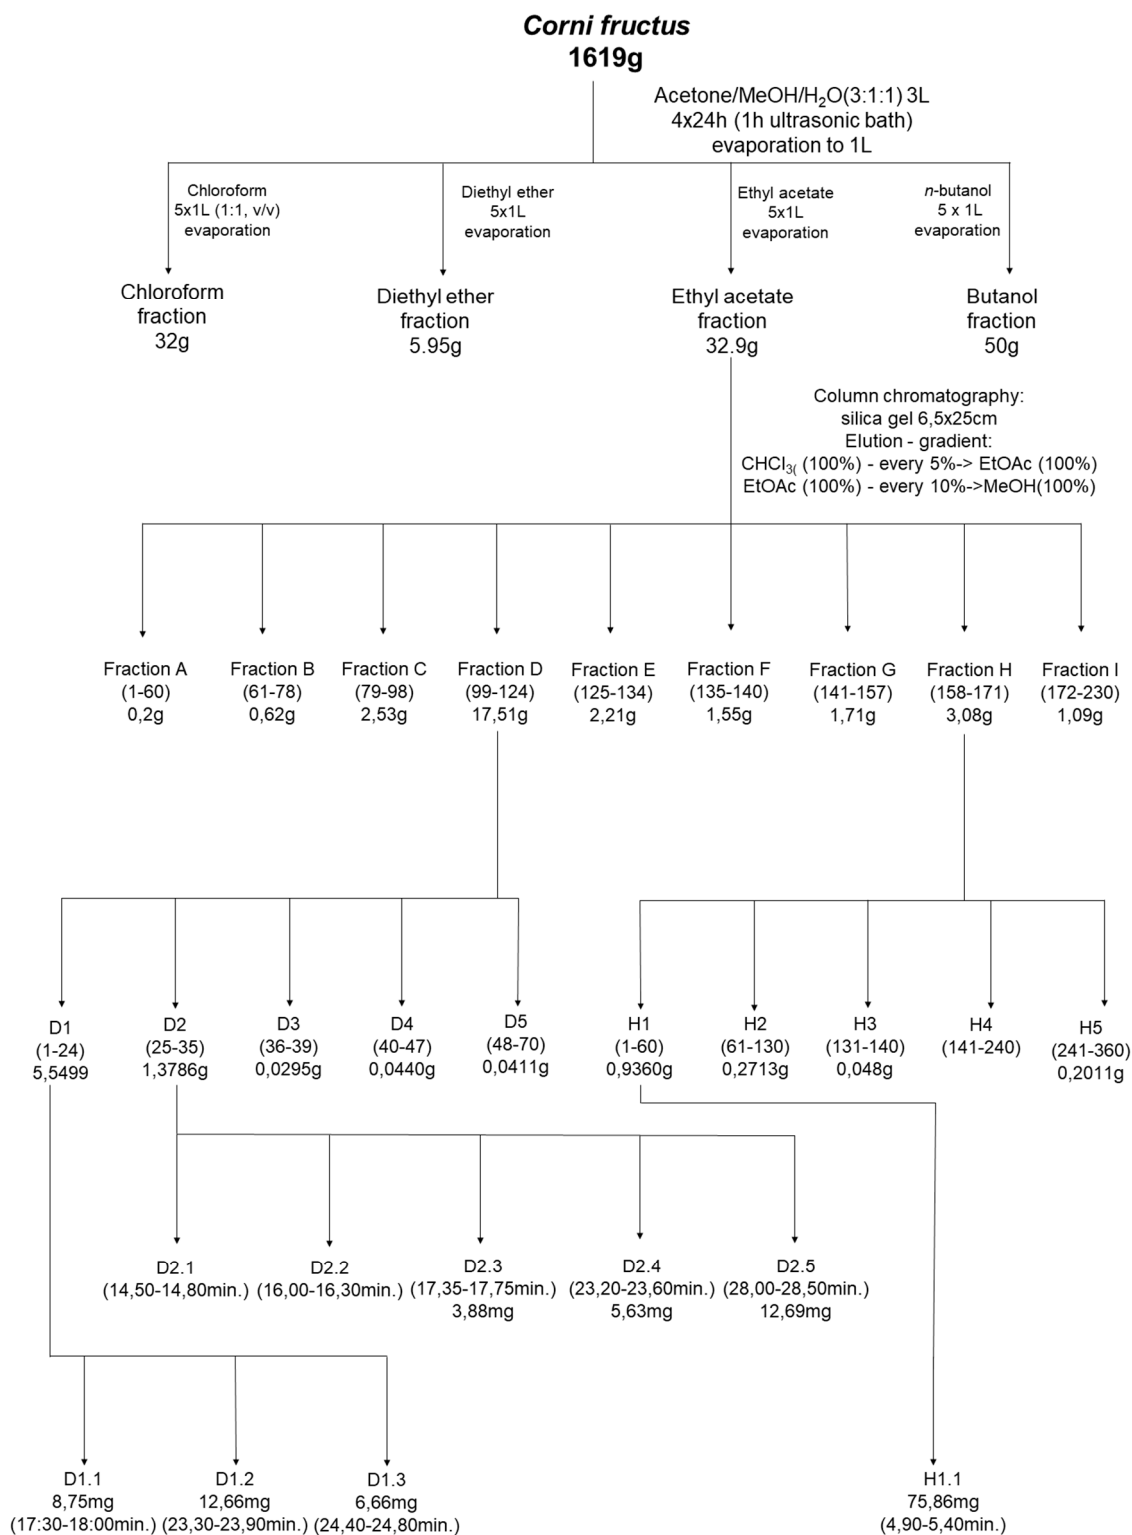

**Figure S4.** The draft of isolation of compounds from acetone-methanol-aqueous (3:1:1, v/v/v) extract from fruit of *Cornus alba*.

## NMR spectra of isolated compounds

### 1. Compound D2\_1 (chlorogenic acid)

The compound D2\_1 was identified as 5-*O*-coumaroylquinic acid. Its structure was confirmed based on the data available in the literature [1].

### 2. Compound D2\_3 (5-*O*-coumaroylquinic acid)

<sup>1</sup>H NMR (300 MHz, CD<sub>3</sub>OD) δ 7.63 (d, *J* = 15.8 Hz, H-7'), 7.46 (d, *J* = 8.5 Hz, H-2',6'), 6.80 (d, *J* = 8.5 Hz, H-3',5'), 6.34 (d, *J* = 16.0 Hz, H-8'), 5.36 (s, H-5), 4.16 (s, H-3), 3.73 (dd, *J* = 3.6, 8.7 Hz, H-4), 2.16 (m, H-2), 2.10 (m, H-6).

The compound D2\_3 was identified as 5-*O*-coumaroylquinic acid. Its structure was confirmed based on the data available in the literature [2].

### 3. Compound D2\_4 (5-*O*-(*E*)-*p*-coumaroylquinic acid methyl ester)

<sup>1</sup>H NMR (300 MHz, CD<sub>3</sub>OD) δ 7.60 (d, *J* = 16.0 Hz, H-7'), 7.46 (d, *J* = 8.6 Hz, H-2', H-6'), 6.81 (d, *J* = 8.6 Hz, H-3', H-5'), 6.29 (d, *J* = 16.0 Hz, H-8'), 5.29 (ddd, *J* = 7.7, 7.7, 4.5 Hz, H-5), 4.14 (dt, *J* = 6.6, 3.4 Hz, H-3), 3.73 (dd, *J* = 7.6, 3.2 Hz, H-4), 2.19 (m, H<sub>2</sub>-6), 2.02 (dd, *J* = 13.7, 6.7 Hz, H<sub>2</sub>-6), 1.30 (s, OCH<sub>3</sub>).

The compound D2\_4 was identified as 5-*O*-(*E*)-*p*-coumaroylquinic acid methyl ester. Its structure was confirmed based on the data available in the literature [3].

### 4. Compound D2\_5 (kaempferol 3-*O*-glucuronide 6''-methyl ester)

<sup>1</sup>H NMR (300 MHz, CD<sub>3</sub>OD) δ 8.01 (d, *J* = 8.9 Hz, H-2' e H-6'), 6.87 (d, *J* = 8.9 Hz, H-3' e H-5'), 6.40 (d, *J* = 1.9 Hz, H-8), 6.20 (d, *J* = 1.9 Hz, H-6), 5.23 (d, *J* = 7.3 Hz, H-1''), 3.65 (s, OCH<sub>3</sub>), 3.60 – 3.34 (overlapping uronic acid moiety).

The compound D2\_5 was identified as kaempferol 3-*O*-glucuronide-6''-methyl-ester. Its structure was confirmed based on the data available in the literature [4].

### 5. Compound H1\_1 (hydroxytyrosol glucoside)

<sup>1</sup>H NMR (300 MHz, CD<sub>3</sub>OD) δ 6.62 (d, *J* = 3.1 Hz, H-2), 6.58 (s, H-5), 6.49 (d, *J* = 2.9 Hz, H-6), 4.31 (d, *J* = 7.7 Hz, H-1'), 4.05 (m, H-8a), 3.88 (d, *J* = 1.9 Hz, H-6'a), 3.79 – 3.65 (overlapping H-5', H-6'b, H-8b), 3.36 – 3.28 (overlapping H-2', H-3'), 3.19 (t, *J* = 8.3 Hz, H-4'), 2.87 (t, *J* = 7.3 Hz, H-7).

The compound H1\_1 was identified as hydroxytyrosol glucoside. Its structure was confirmed based on the data available in the literature [5].

## References

1. Nakamura, K.; Ogasawara, Y.; Endou, K.; Fujimori, S.; Koyama, M.; Akano, H. Phenolic compounds responsible for the superoxide dismutase-like activity in high-brix apple vinegar. *J. Agric. Food Chem.* **2010**, *58*, 10124-10132.
2. Lu Y., Sun Y., Foo L.Y. et al. 2000. Phenolic glycosides of forage legume *Onobrychis viciifolia*. *Phytochemistry* *55*, 67-75.
3. Nakamura S., Fujimoto K., Matsumoto T., et al. 2013. Acylated sucroses and acylated quinic acids analogs from the flower buds of *Prunus mume* and their inhibitory effect on melanogenesis. *Phytochemistry*. *92*, 128-36.
4. Pacifico S., D'Abrosca B., Scognamiglio M., et al. 2013. Antioxidant polyphenolic constituents of *Vitis × Labruscana* cv. 'Isabella' leaves. *Open Nat Prod J.* *6*, 5-11.
5. Romero C., Brenes M., García P., et al. 2002. Hydroxytyrosol 4-β-D-glucoside, an important phenolic compound in olive fruits and derived products. *J Agric Food Chem.* *50*, 3835-9.
